# Supplementary material for: Estimating time-dependent vegetation biases in the SMAP soilmoisture product
Source: Copernicus journal article supplement (doi:10.5194/hess-2018-12), 2018-02-07
Supplement: Supplementary file 1 [file hess-2018-12-supplement.pdf]

# Supporting Information for "Estimating time-dependent vegetation biases in the SMAP soil moisture product"

S. Zwieback, A. Colliander, M. Cosh, J. Martínez-Fernández, H. McNairn, P. Starks, M. Thibeault, A. Berg

January 14, 2018

Table S1: Sensitivity to model assumptions explored using simulations. Each scenario deviates from the baseline with respect to the data generation (forward simulation) or the configuration of the probabilistic model.

|                    | Change to forward simulation         | Change to probabilistic model        |
|--------------------|--------------------------------------|--------------------------------------|
| Soil moisture      |                                      |                                      |
| moisture seasonal  | –                                    | time-variant logistic model          |
| Errors             |                                      |                                      |
| t error            | $\varepsilon \sim T(0, \sigma^2; 6)$ | $\varepsilon \sim T(0, \sigma^2; 6)$ |
| t error simulation | $\varepsilon \sim T(0, \sigma^2; 6)$ | –                                    |
| t error inference  | –                                    | $\varepsilon \sim T(0, \sigma^2; 6)$ |
| autocorrelation    | autocorrelation $\rho_1 = 0.5$       | –                                    |
| Prior distribution |                                      |                                      |
| prior tails        | –                                    | 10 degrees of freedom                |
| prior scale        | –                                    | priors scaled up by 2                |

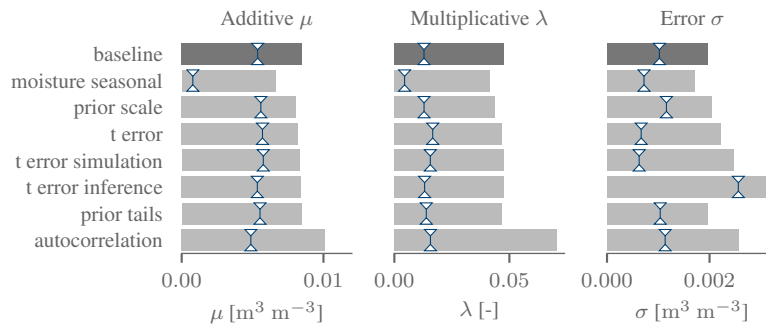

Figure S1: RMSE (bars) and bias (notches) obtained in the simulation study (500 samples) for the variable additive bias parameter  $\mu$ , the variable sensitivity parameter  $\lambda$  [-], and  $\sigma$ . The scenarios deviate from the baseline to explore the sensitivity to specific assumptions.
