# Supplementary material for: Estimating time-dependent vegetation biases in the SMAP soilmoisture product
Source: Copernicus journal article supplement (doi:10.5194/hess-2018-12), 2018-02-07
Supplement: Supplementary file [file hess-2018-12-AC2-supplement.pdf]

This paper describes and applies a new analysis technique to identify time-dependent biases present in remotely sensed soil moisture products. This represents a very significant methodological advancement in the tools available to examine the error structure of these products (indeed any remotely sensed product). The authors offer a compelling motivation their approach (i.e., as we start to use remotely sensed soil moisture data products for coupling applications, it is important that we develop a more sophisticated understanding of their underlying errors). In my view, this paper represents a major step in that direction and has the potential to impact a great deal of on-going research plans (including my own). However, as is often the case with highly novel manuscripts, there are some important questions regarding the presentation and interpretation of results that needed to be cleared up prior to publication.

Wade Crow

We thank Wade Crow for his insightful review. We have made numerous modifications to the manuscript: apart from two new figures, we discuss several key results in considerably more detail.

1) What happens if there is error correlation between the explanatory variable ( $w$ ) and the products ( $y$ )? There are credible reasons to suspect that this arises between the SMOS “tau” product and the SMAP L3 soil moisture product - particularly in agricultural areas. Both products suffer from a common dependence of the zero-order tau-omega emission equation and the assumption of temporally constant surface roughness. These assumptions are particularly problematic over cropland agriculture and their violation could easily induce correlated errors into both products. A related issue is that the interpretation of SMOS tau products is known to be complicated in agricultural areas (see e.g., [https://lib.dr.iastate.edu/agron\\_pubs/115](https://lib.dr.iastate.edu/agron_pubs/115)). In fact the “reference” SMOS tau time series shown in Figure 4a demonstrates questionable features. First, corn crop canopies (responsible for 60% of the land cover in the South Fork water shed) typically demonstrate a biomass plateau between growth stages R2 and R6, which in Iowa which corresponds (roughly) to between August 1 and September 15 later. This expected “plateau” is actually somewhat more consistent with the SMAP “input tau” than the SMOS “reference tau” plotted in Figure 4a. Second, the rise in SMOS tau after October 1 is almost certainly a roughness artifact associated with post-harvest tillage and not a real vegetation opacity signal. So, there are credible reasons to suspect that (at least some) of the dynamics in the “delta tau” results actually reflect error in the SMOS tau “reference” (versus the SMAP tau input).

I’m probably overstating the problems with SMOS tau product here, but the broader question is how results are impacted by the presence of (potentially non-independent) errors in the explanatory variable? Is it possible that the diagnosed time dependent vegetation bias is due (in part) to the presence of error in in the SMOS tau product?

The impact of errors in the tau product on the estimated bias parameters is an important concern that we now address in more detail throughout the manuscript. The main changes are extended discussions and a greater focus on an alternative tau product (sensitivity analysis based on the SMAP tau product) through extended discussions and a new figure. We are aware that we cannot resolve the issues mentioned, a fact we acknowledge openly, but we hope the extended discussions will provide a balanced picture.

There is now a separate discussion section that deals with the interpretation of the inferred biases. There, we posit that the role of errors when analysing the results is contingent on what general view one adopts. One of these views is purely descriptive, the other tries to establish a causal link. The purely descriptive view is easier to uphold because it is only concerned with associations rather than the mechanisms of these associations. As associations can be misleading if interpreted causally (errors in the tau product, confounding, etc.), we have clearly stressed the largely

descriptive nature of our analyses by employing phrases such as "errors associated with the vegetation correction" rather than induced or even caused.

It is the causal view that is more directly affected by errors in the input tau product. While we focus on a largely descriptive view, we do engage in analyses towards establishing a causal link, chiefly via the comparison to tau omega predictions. These comparisons rely on the assumptions of no confounding and no errors in the input tau product. We now mention these assumptions explicitly (see below), and we discuss three important points in this context

- the definition of the errors: in the context of soil moisture retrieval, we believe that it is mainly a model-internal effective parameter (that can partially account for e.g. changes in effective roughness or for an inappropriate choice of the effective scattering albedo). It is this effective parameter that should serve as reference in the computation of delta tau, rather than a purely vegetation-based proxy.
- the nature of the errors, which have both systematic and random components
- possible confounders

The distinction between a hypothetical true tau and an effective tau is, we believe, an important one to make, both for interpreting the estimated biases but also with the view of diagnosing of vegetation-water interactions that forms part of our motivation for studying time-varying biases. For single-channel retrievals, such a value typically exists: for a given soil moisture value (and forward model, single scattering albedo, etc.) it is the value that aligns the error-free brightness temperature with the true soil moisture. For dual-channel or multi-angular algorithms, such a value may not exist, in which case a retrieval of both tau and soil moisture would yield a wrong soil moisture estimate. However, it may be a good approximation, as hinted at by Parrens et al. 2017. They found that a joint retrieval of a single vegetation & roughness parameter, i.e. one effective tau parameter, yielded good soil moisture estimation results; this should work even better for a constant incidence angle (because in that case, the value of  $N_r$  in their model is immaterial).

However, even if such an effective tau did exist, it would be dependent on the algorithm, incidence angle, etc. We stress this view in the discussion. We also highlight the limitations of this view in Sec. 5.2, where we discuss the diagnosing of vegetation-water interactions for which one tends to consider tau to be a vegetation proxy.

Owing to the complexities, we do not hazard a guess as to what influence deviations in the SMOS or SMAP DC tau from either a "true" or an "effective" tau have on the estimated biases. Based on analogies to regression modelling, we would expect causally biased estimates in the presence of random or systematic errors. We state this openly in the completely revised discussions. The two key paragraphs in the new discussion section read:

A mechanistic interpretation of the inferred biases is complicated by a number of poorly understood factors. First, the time-variable biases are relative to the in-situ data. The results over the sparse sites should hence be interpreted with caution due to

representativeness error, even if they are similar to those at the dense high-quality network sites. Even at the network sites, residual time-dependent biases of the in-situ data cannot be ruled out completely. Another major uncertainty are errors in the satellite-derived contemporaneous  $\tau$  products, which are not accounted for in the estimation. One important reason for why these errors are difficult to quantify is that in the context of soil moisture retrieval  $\tau$  can be considered as essentially a model-internal effective quantity (Parrens17). As such, an observation-based estimate of  $\tau$  reflects not only the vegetation conditions but also inaccuracies of the  $\tau$ - $\omega$  model itself, the way it is parameterized and other environmental conditions. An instance for the latter are roughness changes associated with harvest in croplands (Patton13) which likely contribute to the autumnal increase in SMOS  $\tau$  in Fig. 6a. To a good degree of approximation, roughness changes will be captured by the effective  $\tau$  that the SMOS or SMAP DC algorithms retrieve from the brightness temperatures (Parrens17). Nevertheless, the estimates used in this study will still be affected by systematic and random errors with respect to this effective quantity. Systematic differences between the effective  $\tau$  for the SMAP retrievals and that of the SMOS satellite are, for instance, due to different incidence angles and model parameters. The impact of such errors on the estimated biases is unknown, but analogies to simple regression models suggest that they can distort these estimates in either direction.

While it is premature to attribute the inferred biases completely to an imperfect vegetation correction, there are two lines of reasoning that suggest that the inferred biases are not spurious. First, they are fairly consistent across croplands, and also between sites with sparse and dense in-situ networks. Also, they tend to be large both in absolute terms (e.g.  $\lambda > 0.1$ ) and compared to the posterior uncertainties. Further, they are also robust to the specification of the input  $\tau$  product (SMAP DC instead of SMOS  $\tau$ ) and to several model modifications (Sec.5). However, these results are purely descriptive in that they only quantify associations, rather than establishing a causal link. A first step towards such a mechanistic interpretation is the comparison of the time-variable biases with predictions by the  $\tau$ - $\omega$  model. This second line of reasoning suggests that the magnitude of the multiplicative biases  $\lambda^*$  is largely consistent with theoretical expectations (Fig. 4a). However, this analysis is contingent on i) the  $\tau$ - $\omega$  model being appropriate and correctly specified (e.g. known  $\omega$ ), ii) there being no confounding biases such as seasonal inundation, and iii) the sufficient accuracy of the input  $\tau$  product. It is difficult to dispel these concerns, and indeed the deviations from the predictions (for  $\mu^*$ ) indicate that unconsidered phenomena also contribute to the time-varying biases in addition to those resulting from the vegetation correction.

2) Section 2.1.1 – While the notation presented here which suggests that all three soil moisture products are subject to the same error model, I couldn't find any discussion of retrieved error parameters for the other two soil moisture products (i.e., in situ and MERRA). In addition, there seems to be a break in symmetry in that the selected explanatory variable is relevant for only one product (SMAP L3) and Figure 1 seems to indicate that no explanatory is applied to the in situ product. One of the appealing facets of triple collocation is the symmetry in its treatment of all three products. Does the break in symmetry applied here (via the selection of a single explanatory variable) preclude the objective cross comparison of error results across all three products? Discussion of error results for the other two products would also help establish credibility of the approach (e.g., were in time dependent biases found in the MERRA product and did that analysis reflect the known superiority of the core network relative to the other two products?).

We now discuss some of the estimated parameters pertaining to the other products. First, we have added a new figure (Fig. 8) that shows the estimated noise level for all three products, or more precisely a normalized version that facilitates inter-product comparisons. In particular, the discussion addresses the spatial representativeness issues raised at several points in the referee report:

To analyse the estimated noise level for all three products, we computed a normalized version  $\sigma/l$ , where the division by  $l$  accounts for the different dynamic ranges of the three products by scaling the noise level with respect to the in-situ data (Fig. 8). SMAP achieves a median value of 0.045  $m^3m^{-3}$ , a higher value than that of the in-situ data or MERRA-2 (0.029 and 0.040  $m^3m^{-3}$ , respectively). For all three products, the corresponding values over the network sites are smaller by around 50%. For the in-situ data, the larger noise level at the sparse sites is not surprising, owing to their limited representativeness. However, direct comparisons could be misleading. For instance, the larger noise level estimates (and greater spread of these estimates) may be partially accounted for by the small number of available networks and by the heterogeneous land cover and vegetation conditions across the sparse sites in the contiguous US.

We also discuss MERRA  $\mu/\lambda$  parameters in a bit more detail, both in terms of the rationale and the results. With respect to the rationale, we have added that 'the inclusion of a delta tau dependent bias for the reanalysis product is not driven by physical reasoning, as the MODIS NDVI climatology that gives rise to a non-zero delta tau plays no role in the generation of the MERRA reanalysis product. However, there is a compelling statistical reason to include the same explanatory variables as in the remotely sensed product. By controlling for the same explanatory variables, the impact of potential confounders - e.g. a seasonal bias that is correlated with Delta tau - on the bias estimates of the remotely sensed product can be reduced. If this were not done, the model would try to partially adjust the time-variable bias term of the remote sensing product to minimize the systematic differences to the re-analysis product, thus distorting these bias estimates.' With respect to the results, we mention in the results that 'Reanalysis bias parameters were estimated as well, but they are considerably smaller in magnitude than those of the SMAP product.' More precisely, the  $\mu$  parameter of the MERRA product is 0.000 on average (compared to 0.007 for the SMAP product), whereas for  $\lambda$  they are 0.04 and 0.18 respectively. Further, their direction is highly heterogeneous, whereas the SMAP bias parameters are all of the same sign.

Finally, we do not share the view that the notation in Section 2.1.1. suggests that the error models are identical for all products. To include the possibility of different error models, we indexed the explanatory variables and the number of explanatory variables by the product. To better highlight this dependence, we now write "The explanatory variables can depend on the product  $n$  as well as on the parameter ( $\mu$ ,  $\lambda$ ). We also highlight that we use a reference product that is assumed unbiased.

3) Section 2.1.2 - The auto-regressive nature of a soil moisture time series signal is (arguably) its most defining characteristic. Therefore, the application of a transformed white noise process in (5)

as a temporal soil moisture model is jarring. Some discussion regarding the sensitivity of results to the lack of serial correlation in (5) is needed. It is hard to imagine that the retrieval of time-dependent bias parameters is not impacted at least somewhat by the neglect of serial auto-correlation in the soil moisture model.

We share those concerns, and we devised the simulation study to address some of them: in the simulations, the simulated soil moisture is auto-correlated, whereas the standard inference model implementation prescribes independent soil moisture values. However, we do agree that we did not discuss these aspects in sufficient detail. We now discuss the issue of time scales in the simulation section 3:

The other crucial assumption in the model is the probability distribution for the soil moisture. Also here, the changes are typically small (up to 10% improvement in the RMSE, but a decrease in bias) when replacing the standard time-invariant model by a seasonally variable model. The improvement suggests that the model-internal soil moisture distribution can have an impact on the estimated bias parameters, in particular when the actual soil moisture is correlated with the explanatory variable, as it was in the simulated data. We would hence expect that for most applications it is the seasonal and sub-seasonal time scales that the soil moisture model should be able to capture. For comparison, autocorrelation on the inter-storm time scale that is not captured by our model but present in the simulated data did not seem to have a major impact (sufficient fidelity for the full model, Fig 2)

To expand on our discussion in the manuscript, we believe it is important to distinguish different time scales. The temporal structure of soil moisture time series is of course complex. To simplify it, we isolated two important time scales: long (i.e. seasonal) time scales, and short time scales

As outlined in our discussion, we believe that representing the seasonal time scales, on which also the biases vary in our application, is more important for accurate bias parameter inference than correctly representing the very short time scales. We do want to explore the shorter time scales in the future, though. It is definitely possible to represent such time scales in the model itself, but it requires a clever implementation (initially, we had tried to implement an AR-1 model for soil moisture, but it was impractical because the MCMC sampling was very slow, which is usually thought to indicate an issue with the way the model is set up. Internally, there are different ways to parameterize the same model, and they are not equivalent in terms of MCMC sampling efficiency).

4a) Section 2.2 - I understand that the Bayesian inference applied here is a fairly standard statistical procedure; however, I think it would help the (general earth science) reader if the authors provided more expository detail on exactly how the MC chain is implemented to solve the Bayesian problem. I'm a little unclear, for example, on how time is handled in the analysis (i.e. the analysis conducted sequentially or as a batch process across all time?).

To paint a clearer picture of the Bayesian approach, we have extended the description of the MCMC sampling.

... Here, we rely on Hamiltonian Monte Carlo as implemented using the adaptive No-U-Turn Sampler in pymc3. The No-U-Turn Sampler produces successive, dependent samples of the posterior distribution that are called a chain. Each sample consists of draws from the posterior distribution, or actually an approximation thereof, of all the unobserved random variables (Output in Fig1b). They comprise the parameter random variables (e.g. the time-dependent biases) as well the soil moisture time series, i.e. one value of  $\theta$  for each SMAP observation. For each location, we sample two independent chains with 2000 samples each, which standard quality controls (divergences, chain mixing) indicate is sufficient. Following common practice, the first 1000 samples are discarded

4b) On a related point, I'm also not quite clear on how effective the triple collocation analogy is. For example, the decision to use  $N=3$  products seem almost arbitrary (e.g., later on the analysis, the MERRA product is dropped with apparently minimal consequence). Presumably, larger  $N$  equates to tighter posterior distributions; however, this is never clarified.

We agree that there are limitations to the analogy. Similar issues commonly arise when comparing classical inference approaches with Bayesian approaches. Classical approaches, including method-of-moments-type estimators that classical triple collocation can be thought an instance of, are plagued by problems of identifiability. In order for them to be applied successfully, the data must provide sufficient information to estimate all parameters at the same time, loosely speaking. In case of classical triple collocation, these are  $N=3$  three error variances and often also  $N-1=two$  sets of bias parameters (often called additive and multiplicative bias), and they can be uniquely identified when  $N = 3$  (but not when  $N = 2$ ).

Conversely, for Bayesian approaches this issue does not arise in this form, owing to the prior information. A proper prior distribution (which is what we adopt in our approach) ensures valid posterior distributions even in the extreme case that no data are available, in which prior = posterior. A relevant publication in this context is Bayarri and Berger, *The Interplay of Bayesian and Frequentist Analysis*, Statistical Science, 2004.

In such data-poor situations the specific choice of prior plays a crucial role. It is to minimize the importance of the prior that we assumed 3 products, in analogy to triple collocation, as 3 products provide enough information even without any priors (classical case). For the scenario with only two products, we prescribed a much stronger prior on the in-situ data in an attempt to make up for the reduced information content.

We do realize that these qualitative arguments can only partially address the valid concern raised by the reviewer. However, we do not have theoretical results to bolster these views. The simulations studies indicate that  $N = 3$  products is sufficient to estimate the parameters of interest (more precisely: to substantially narrow the posterior distribution compared to the prior). With respect to the appropriate choice of products (number, type, etc.), our manuscript leaves a lot of questions open.

To better address these concerns, we have provided an abridged summary of our rationale in Sec. 2:

We focus on a setting inspired by triple collocation studies, i.e. we for the most part assume that  $N = 3$  independent and noisy products are available Gruber 16. In regular triple collocation, three independent products provide sufficient information to estimate the random errors of all three products and bias parameters of two of the three products. In a Bayesian setting, the presence of prior information allows one to reduce the number of independent products, but the results will strongly depend on the prior distributions.

5) Section 4.1.1 – I had to read this section a couple of time before I realized that the in situ observations were directly used as one of the three products in the Bayesian analysis (and not withheld as some type of independent verification). Presumably, the in situ observations correspond to the “ $y_0$ ” product in described in Figure 1; however, I’m not sure if that link is ever explicitly made. More clarification on this point would be helpful.

We have made two changes. First, we now list the three input products in the very first sentence of this section, and then describe them in more detail. Second, we now explicitly state that the in-situ data constitute the reference product  $y_0$  (before, we had written that product  $n = 0$  is the reference product).

6) Section 4.2.1 – Here I missed something fairly basic. What exactly is meant by the “model” referenced in the 3rd paragraph of the section and the vertical shading in parts b) and c) of Figure 4? Presumably, the authors are referring to the tau-omega model sensitivity results shown in Figure 3. However, this is never quite made clear. In addition, it isn’t clear to me exactly how the (site-independent) “model” bias parameters are calculated. As a result, I’m missing some of the insight provided by Figures 4b and 4c. Is the take-away message that, despite not being given explicit access to the tau-omega model, the Bayesian model recovers the same bias parameter results predicted by the tau-omega model? I recommend that the authors spend a little more time outlining the context behind (and the interpretation of) Figure 4.

We have greatly extended the description and discussion of this aspect. The methods are now described in much greater detail. For  $M$  and  $L$ , we write

To compute the predicted biases in Fig. 3a), we assumed the  $\tau$ - $\omega$  model applied and was correctly specified (temperature, dielectric mixing model [Dobson; silt loam], single-scattering albedo  $\omega = 0.05$ , etc.). For a given value of  $\tau_{\text{true}}$ , we simulated the V-polarized brightness temperatures for dry and wet soil moisture conditions. These brightness temperatures were in turn the basis for estimating soil moisture by inverting the  $\tau$ - $\omega$  model using the wrong  $\tau_{\text{inv}}$  as a function of  $\Delta \tau$ . For both dry and wet soil moisture conditions, the deviation was an estimate of the retrieval bias: their mean was taken to be an estimate of the offset  $M$ , whereas their difference allowed us to estimate  $L$ . When plotted against  $\Delta \tau$ ,  $M$  and  $L$  increase nearly linearly and only show a weak dependence on  $\tau_{\text{true}}$ . The slope of this relation is thus well but not perfectly defined. We refer to the slopes as  $\mu^{\star}$  (for  $M$ ) and  $\lambda^{\star}$  (for  $L$ ), respectively.

To account for the spread due to the slight curvature and dependence on  $\tau$ , we estimated the likely range of values by computing the slopes from the differences in L or M between five equally spaced values of  $\Delta \tau$  (between -0.1 and 0.1), repeated for equally many values of  $\tau_{\text{true}}$  (between 0.1 and 0.6). The range of these values was  $\lambda^{\text{star}}_{\text{pred}}$  in [2.0, 3.8] and  $\mu^{\text{star}}_{\text{pred}}$  in [0.33, 0.65] m<sup>3</sup>m<sup>-3</sup>. These ranges will later be compared to data-driven estimates, thus providing a first-order assessment of the agreement between predictions and observations, despite the neglect of other retrieval errors.

We have also amended Fig. 3 (showing the star parameters explicitly). In the results, we have extended the description of the model-estimate comparison:

When converted into absolute quantities ( $\lambda^{\text{star}}$ ), the inferred dependence of L on  $\Delta \tau$  matches the model predictions reasonably well (Fig. [\ref{fig:networksites}](#)b). In other words, the data-derived, completely independent estimate is broadly consistent with the predicted impact of a  $\tau$  misspecification in the retrieval, despite limitations in the estimates (e.g. issues with the reference  $\tau$ ) and the model predictions (e.g. assumed knowledge of the land surface temperature) of  $\lambda^{\text{star}}$ . There is no clear apparent dependence of  $\lambda^{\text{star}}$  on location or land cover properties; for instance, Monte Buey and Bell Ville are within < 100 km of one another, and despite the similarity in planted crops the latter's  $\lambda^{\text{star}}$  is considerably larger.

We now also revisit this issue in the discussions; the associated changes to the appropriate section are described in our reply to point 1.

7) Section 4.2.2 - The authors provide a nice sensitivity analysis which describes the impact of using a different  $\tau$  reference on results (in the first two columns of Figure 6). In theory, this should go a long way in addressing my first point; however, (as with the case in Figure 4 above) I did not take away as much from this figure as I had hoped. The lack of sensitivity in the time-variation bias parameters to the use of a second  $\tau$  references is reassuring. However, I don't quite follow why the large changes observations when using a contemporary MODIS  $\tau$  indicates a lack of sensitivity to the use of MODIS  $\tau$  climatology in the SMAP L3 retrievals. The  $\Delta \tau$  generated by the MODIS contemporary minus climatology differences leads to significantly non-zero  $\lambda$  and  $\mu$  estimates - just not the same estimates as the application of "delta tau" results generated relative to SMOS  $\tau$ . How exactly does this support the conclusion that inter-annual  $\tau$  anomalies are not a significant source of error? Some additional discussion on this point would be very helpful. I also think a fuller sensitivity discussion of results in Figure 6 here would likely go a long way towards addressing concerns I raised in my first point.

We have made two changes. First, we have added a new figure that also shows the results of the sparse sites obtained with the SMAP-based  $\Delta \tau$ . This figure also features in the second change, namely the extended descriptions. We also point out under what assumptions the smaller estimates obtained with the contemporaneous MODIS  $\tau$  can be interpreted to indicate that the biases are not only due to outdated NDVI-derived data in the retrieval. In the results section, we write:



Our sensitivity analyses focus on the reference  $\tau$  product. When the SMAP dual channel result is used as the reference  $\tau$  product, the bias parameters change little for the vast majority of sites (Fig. 6). When the posterior uncertainties are taken into account, the  $\lambda$  and  $\mu$  values tend to overlap with those obtained using the SMOS  $\tau$  product, indicating that the results are not sensitive to the choice of microwave-derived reference  $\tau$  product. Also the spatial patterns across the sparse study sites are very similar (Fig. 8).

We have also extended the analysis of the MODIS-derived Delta  $\tau$ .

By contrast, the estimates can change substantially when  $\tau$  is derived from contemporaneous NDVI data, and predominantly they are smaller in magnitude. If the problem with the use of the NDVI climatology in the retrieval were the use of a climatology alone, we would expect similar estimates. Conversely, we would expect the estimates to be smaller if it was the link between NDVI and  $\tau$  that led to an inaccurate vegetation correction. The smaller estimates that were actually observed may thus indicate that the use of a climatology is not a dominant error source in the SMAP vegetation input data.

As outlined in our reply to point 1), there is now a separate discussion section that deals with errors in  $\tau$  in the context of interpreting the results.

8) Section 4.2.4 – The author's link the results in Figure 7c to the presence of time-dependent errors identified in Figure 7a and 7b. However, there is a major difference in that Figure 7c results reflect climatological anomalies (lacking any seasonality) while results in 7a and 7b reflect time-dependent biases which (almost certainly) have a fixed seasonal component (which, of course, would not be reflected in an anomaly). Therefore, a substantial(?) fraction of the time dependent biases reflected in Figures 7a and 7b have no impact on anomaly results in Figure 7c. Given this, I'm unclear exactly what the relevance of Figures 7a and 7b is for the interpretation of Figure 7c (although, admittedly there does appear to be some spatial consistency across the sub-figures).

We have extended the discussion of these results. Our main point in the discussions is not that there is a clear-cut link between the estimated biases and the  $R^2$  values, but rather that the spatial patterns suggest that there may be one that deserves attention in future studies.

In the results:

While the spatial patterns largely match those of the time-variable biases, the link between them is not clear and not necessarily uniform across all sites. The computation of anomalies largely removes seasonal offsets, which constitute a major fraction of the estimated additive biases. However, it does not remove higher-frequency variations or inter-annual differences, although the record is too short to reliably study those. Neither can it account for the changes in sensitivity, which are particularly large over croplands. Finally, the in-situ soil moisture anomalies, predominantly derived from single probes, are subject to major uncertainties. All these factors likely contribute to the elevated associations between the  $\tau$  and the SMAP soil moisture anomalies (Delta  $R^2$ ), but the

precise impact of time-variable biases on our ability to diagnose such interactions remains an open question.

In the discussion:

The spurious vegetation signal in the soil moisture data may distort estimates of water-vegetation coupling. We find inflated values of  $R^2$  between the SMOS vegetation optical depth and SMAP soil moisture, whereas purely random noise would decrease the  $R^2$  (Fig. 7c). While the spatial patterns largely match those of the estimated biases, this does not imply a causal link between the two. However, the inflated  $R^2$  values hint at potential pitfalls in using remotely sensed soil moisture to study global hydrology.

9) I also have two general comments concerning Figure 7. I'll present them as "comments" to reflect that I'm inclined to give the authors some latitude with how they respond to them: A) The authors discuss spatial representative issues; however, the impact of upscaling a single, point-scale observation to the SMAP footprint scale should not be underestimated. While the point is never explicitly made in Chan et al. [2016]; however, a comparison of TC-based results in (their) Figures 7 and 9 suggests that the correlation between a single-point ground observation and grid-scale truth is approximately equal to that between ASCAT soil moisture retrievals and the same grid-scale truth. Given that there is strong reason to suspect that SMAP soil moisture products are significantly more precise than ASCAT products, a priori, I'd expect single-point ground observations to be a noisier source of grid-scale soil moisture than SMAP L3 retrievals over a great deal of the United States. Combined with the fact that there is likely some error cross-correlation between SMAP L3 products and SMOS tau products (especially over agricultural sites see my point #1 above), it seems possible that results in Figure 7c can be explained without the need to invoke the presence of time-dependent vegetation biases in the SMAP L3.

Chen, F., Crow, W.T., Colliander, A., Cosh, M.H., Jackson, T.J., Bindlish, R., Reichle, R.H., Chan, S.K., Bosch, D.D., Starks, P.J. and Goodrich, D.C. Application of triple collocation in ground-based validation of Soil Moisture Active/Passive (SMAP) level 2 data products. IEEE Journal of Selected Topics in Applied Earth Observations and Remote Sensing. 99:1-14. 10.1109/JSTARS.2016.2569998. 2016.

B) Point-to-grid upscaling issues associated with ground-based soil moisture observations are particularly daunting for agricultural landscapes. Most of the time the actual site isn't even located in a cultivated field (instead that are typically shunted into non-cultivated areas at the edges of the field). As a result, these measurements have no hope of capturing (often significant) inter-annual soil moisture variability associated with changes in planting, canopy development and crop development. Given the soil moisture ground measurement expertise among the co-authors, I'll defer to their judgment on this issue - but it does seem relevant to the interpretation of Figure 7c.

We agree with the limitations of the sparse sites. This is also why we discuss the network sites in considerably more detail. Our motivation for including Figure 7c) is the similarity of the spatial patterns, which do suggest a connection. However, we make clear that the specifics of this link are currently unknown. In the future, we hope that our work on biases will inform the interpretation of correlation coefficients, regression models and similar statistics.

We hope the extended discussions, see in particular our reply to the previous point, clarify this stance.
